# Supplementary material for: Preventing social defeat stress-induced behavioural and neurochemical alterations by repeated treatment with a mix of Centella asiatica, Echinacea purpurea and Zingiber officinale standardized extracts
Source: PubMed Central journal article supplement (PMC11381240; doi:10.3389/fphar.2024.1439811), 2024-08-26
Supplement: DataSheet1.pdf [file DataSheet1.pdf]

# ConPhyMP checklist of information for reporting plant material and its initial processing <sup>1,2</sup> (relevant for all studies on medicinal and food plants including extract types A, B, and C)

| SECTION/TOPIC                                                                      | ITEM NO. | CHECKLIST ITEM                                                                                                                                                                                                                                                                                                                                                                                                                                              | YES                              | NO                    | NOT APPLICABLE                   | PAGE NO., IF ANY |
|------------------------------------------------------------------------------------|----------|-------------------------------------------------------------------------------------------------------------------------------------------------------------------------------------------------------------------------------------------------------------------------------------------------------------------------------------------------------------------------------------------------------------------------------------------------------------|----------------------------------|-----------------------|----------------------------------|------------------|
| Title and abstract                                                                 | 1        | A clear and concise title including an informative abstract and balanced summary.                                                                                                                                                                                                                                                                                                                                                                           | <input checked="" type="radio"/> | <input type="radio"/> | <input type="radio"/>            |                  |
| Description of the botanical drug and taxonomic authentication                     | 2        | Botanical or morphological authentication of the plant material (desirable is a combination with DNA barcoding, e.g., PCR, RFLP, genome sequencing) and the information must be included in a separate section of Material and Methods, if applicable, combined with the information required under item 3:                                                                                                                                                 | <input checked="" type="radio"/> | <input type="radio"/> | <input type="radio"/>            |                  |
| Description of the extract and extraction process                                  | 3        | A separate section in Material and Methods, covers the relevant information on the material investigated, including the full species name(s), authorities and family; e.g. <i>Salvia miltorrhiza</i> Bunge [Lamiaceae; <i>Salvia miltorrhizae radix et rhizoma</i> ], and on the processing and extraction of the crude drug including the traditional processing of the material used medicinally (fumigation, steaming, roasting, cooking, frying, etc.). | <input checked="" type="radio"/> | <input type="radio"/> | <input type="radio"/>            |                  |
| Documentation of the legal basis for collection and processing                     | 4        | Full compliance with the Nagoya protocol, CITES, and all associated treaties including phytosanitary regulations.                                                                                                                                                                                                                                                                                                                                           | <input checked="" type="radio"/> | <input type="radio"/> | <input type="radio"/>            |                  |
| Description of product characteristics, in case of a finished (commercial) product | 5        | Information on the characteristics of the commercial products including batch number and date of production/best by information and regulatory status.                                                                                                                                                                                                                                                                                                      | <input type="radio"/>            | <input type="radio"/> | <input checked="" type="radio"/> |                  |

**Note:** Please also include here the following information about your submitted manuscript:

Name of the journal: **Frontiers in Pharmacology**

Date of the enquiry: **28/07/2024**

Title of the manuscript: **Preventing social defeat stress-induced behavioural and neuroendocrine changes in mice**

List of the authors: **Alessia Costa, Laura Micheli, Virginia Sordi, Clara Ciampi, Jaume Guadaño-Ferraz**

<sup>1</sup> Please acknowledge/cite this as follows: Heinrich M, Jalil B, Abdel-Tawab M, Echeverria J, Kulic Ž, McGaw LJ, et al. Best Practice in the chemical characterisation of extracts used in pharmacological and toxicological research—The ConPhyMP—Guidelines. *Frontiers in Pharmacology*. 2022;13:953205. <https://doi.org/10.3389/fphar.2022.953205>

<sup>2</sup> We strongly recommend reading this checklist in conjunction with ConPhyMP 2022 explanation and elaboration for important clarifications on all items. If relevant, we also recommend after reading Heinrich et al. (2020) Best practice in research—Overcoming common challenges in phytopharmacological research. *Journal of Ethnopharmacology*. 2020;246:112230. <https://doi.org/10.1016/j.jep.2019.112230>

# ConPhyMP checklist of items for conducting and reporting analytical methods<sup>1,2</sup> relevant for extract type A (for species or botanical drugs covered in a monograph in one of the national or regional pharmacopoeias)

| SECTION/TOPIC                                                                                                                                                                 | ITEM NO.                         | CHECKLIST ITEM                                                                                                                                                                                                                                                                                                                        | YES                              | NO                    | NOT APPLICABLE                   | PAGE NO., IF ANY |
|-------------------------------------------------------------------------------------------------------------------------------------------------------------------------------|----------------------------------|---------------------------------------------------------------------------------------------------------------------------------------------------------------------------------------------------------------------------------------------------------------------------------------------------------------------------------------|----------------------------------|-----------------------|----------------------------------|------------------|
| Type of extract                                                                                                                                                               | 1                                | A – Confirm that the species or botanical drug under investigation is covered in a monograph in one of the national or regional pharmacopoeias.                                                                                                                                                                                       | <input checked="" type="radio"/> | <input type="radio"/> | <input type="radio"/>            |                  |
| Preferred/main methods for extract characterisation/chemical analysis                                                                                                         | 2                                | Compliance with pharmacopoeial standards to be followed:                                                                                                                                                                                                                                                                              |                                  |                       |                                  |                  |
|                                                                                                                                                                               |                                  | (a) The description of the active ingredients in the botanical drug (if known) or analytical marker compounds as defined.                                                                                                                                                                                                             | <input checked="" type="radio"/> | <input type="radio"/> | <input type="radio"/>            |                  |
|                                                                                                                                                                               |                                  | (b) An analysis as defined in the monograph is needed if the extract has not been supplied with a certificate.                                                                                                                                                                                                                        | <input type="radio"/>            | <input type="radio"/> | <input checked="" type="radio"/> |                  |
|                                                                                                                                                                               |                                  | (c) If the preparation was purchased, the manufacturer and certificate of analysis need to be included.                                                                                                                                                                                                                               | <input type="radio"/>            | <input type="radio"/> | <input checked="" type="radio"/> |                  |
|                                                                                                                                                                               |                                  | Including either the preferred or alternative approaches for characterisation:                                                                                                                                                                                                                                                        |                                  |                       |                                  |                  |
|                                                                                                                                                                               |                                  | (a) Triple chemical fingerprinting methods, each with one or more detection parameters.                                                                                                                                                                                                                                               | <input checked="" type="radio"/> | <input type="radio"/> | <input type="radio"/>            |                  |
| (b) Quantification of at least two marker compounds (unless this is not feasible, evidence needs to be provided), and justification of the choice of markers (if applicable). | <input checked="" type="radio"/> | <input type="radio"/>                                                                                                                                                                                                                                                                                                                 | <input type="radio"/>            |                       |                                  |                  |
| Alternative methods for extract characterisation/chemical analysis                                                                                                            | 3                                | (a) Single chemical fingerprinting method with at least three different detection parameters (i.e., altered detection parameters, like TLC/HPTLC with different staining reagents and/or UV excitation wavelengths, HPLC-DAD/LCDAD with different wavelengths). The same applies to coupling MS or NMR to chromatographic techniques. | <input checked="" type="radio"/> | <input type="radio"/> | <input type="radio"/>            |                  |
|                                                                                                                                                                               |                                  | (b) Quantification of at least two marker compounds (unless this is not feasible, evidence needs to be provided), and justification of the choice of markers (if applicable).                                                                                                                                                         | <input checked="" type="radio"/> | <input type="radio"/> | <input type="radio"/>            |                  |
| Use of reference standards                                                                                                                                                    | 4                                | (a) Direct overlay of the chromatogram of the sample with that of an officially specified reference standard (if applicable).                                                                                                                                                                                                         | <input checked="" type="radio"/> | <input type="radio"/> | <input type="radio"/>            |                  |
|                                                                                                                                                                               |                                  | (b) Chromatographic fingerprinting: Direct overlay of the chromatogram of the sample with that of official reference standards of the powdered plant material or the dry extract from the plant material.                                                                                                                             |                                  |                       |                                  |                  |
| Comparison of different extracts/samples of the same plants                                                                                                                   | 5                                | (a) Direct comparison of the chromatographic/spectroscopic system and/or scoring system for “similarity” to be followed.                                                                                                                                                                                                              | <input checked="" type="radio"/> | <input type="radio"/> | <input type="radio"/>            |                  |

**Note: Please also include here the following information about your submitted manuscript:**

|                          |                                                                |
|--------------------------|----------------------------------------------------------------|
| Name of the journal:     | Frontiers in Pharmacology                                      |
| Date of the enquiry:     | 28/07/2024                                                     |
| Title of the manuscript: | Preventing social defeat stress-induced behavioural and neu    |
| List of the authors:     | Alessia Costa, Laura Micheli, Virginia Sordi, Clara Ciampi, Ja |

<sup>1</sup> Please acknowledge/cite this as follows: Heinrich M, Jalil B, Abdel-Tawab M, Echeverria J, Kulic Ž, McGaw LJ, et al. Best Practice in the chemical characterisation of extracts used in pharmacological and toxicological research—The ConPhyMP—Guidelines. *Frontiers in Pharmacology*. 2022;13:953205. <https://doi.org/10.3389/fphar.2022.953205>

<sup>2</sup> We strongly recommend reading this checklist in conjunction with ConPhyMP 2022 explanation and elaboration for important clarifications on all items. If relevant, we also recommend after reading Heinrich et al. (2020) Best practice in research—Overcoming common challenges in phytopharmacological research. *Journal of Ethnopharmacology*. 2020;246:112230. <https://doi.org/10.1016/j.jep.2019.112230>
